# Supplementary material for: Heterologous prime-boost vaccination targeting MAGE-type antigens promotes tumor T-cell infiltration and improves checkpoint blockade therapy
Source: PubMed Central journal article supplement — J Immunother Cancer. 2021 Sep 2;9(9):e003218. doi: 10.1136/jitc-2021-003218 (PMC8420668; doi:10.1136/jitc-2021-003218), 2021-09-02
Supplement: jitc-2021-003218supp001.pdf [file jitc-2021-003218supp001.pdf]

## **Supplemental materials and methods**

### **Viral vectors**

The coding sequence of P1A or the juxtaposed coding sequences of MAGE-A3 and NY-ESO-1 were inserted into the E1 locus of ChAdOx1 under a CMV immediate early promoter. A sequence coding for the 26 amino acid transmembrane domain of the MHC-II invariant chain with sequence fragment was linked to the N terminus of the transgene, described previously <sup>1</sup>. The MVA vectors encoding P1A, MAGE-A3 and NY-ESO-1 were constructed with or without the leader sequence of the human tissue plasminogen activator gene (tPA) with the F11 promoter driving transgene expression. Viral vectors were isolated and purified as described <sup>2</sup>. The purity and identity of the viral vectors were confirmed by PCR.

### **Tumor biopsy for gene expression analysis**

Tumor masses were surgically excised and pieces ≤30 mg were immediately frozen in liquid nitrogen and stored at minus 80°C. Total cellular RNA was isolated using a RNeasy mini kit (Qiagen) with column-based RNase-free DNase I (Qiagen) digestion to remove genomic DNA, then used for gene expression analysis.

### **Reverse Transcription Quantitative PCR (RT-qPCR)**

Total cellular RNA (0.5 µg) was used to synthesize first single-strand cDNA using the SuperScript III First-Strand Synthesis kit (Thermo Fisher). Reactions were performed according to the manufacturer's protocol. For quantification of cDNA by qPCR, the QuantiTect SYBR Green PCR kit (Qiagen) was used and reactions set up according to the manufacturer's instructions. Reactions were run on the StepOnePlus™ Real-Time PCR System (Applied Biosystems) at the following conditions – 95°C - 15 min, (94°C 15s + 60°C 30s + 72°C 30s) x 40 cycles. Gene expression at the mRNA level for each target gene assayed was quantified relative to an internal housekeeping gene control. The housekeeping genes

used were either *ActB* or *Hprt1*. To determine relative mRNA expression, the mean  $\Delta Ct$  (difference in cycle threshold number) was calculated for each target gene relative to *ActB* or *Hprt1*.  $\Delta Ct$  for a given target gene in each sample was therefore calculated according to the formula  $\Delta Ct = Ct \text{ Target gene} - Ct \text{ Housekeeping gene}$ . Relative mRNA expression data are shown as  $2^{-\Delta Ct}$ . The list of primers used is shown in table S1.

**Table S1: qPCR primer sequences**

| Primer           | Sequence (5'-3')         |
|------------------|--------------------------|
| <i>Actb</i> for  | CCTTCAACACCCCAGCCATGTA   |
| <i>Actb</i> rev  | GGATGGCGTGAGGGAGAGCAT    |
| P1A for          | AGCTGAGGAAATGGGTGCTG     |
| P1A rev          | CAGCATTTTCACACCTACACTCCA |
| <i>Hprt1</i> for | AGTGTGGATACAGGCCAGAC     |
| <i>Hprt1</i> rev | CGTGATTCAAATCCCTGAAGT    |
| <i>Cxc19</i> for | GCCATGAAGTCCGCTGTTCT     |
| <i>Cxc19</i> rev | GGGTTCTCGAACTCCACACT     |
| <i>Cxc10</i> for | GACGGTCCGCTGCAACTG       |
| <i>Cxc10</i> rev | GCTTCCCTATGGCCCTCATT     |
| <i>Ccl3</i> for  | GCCAGGTGTCATTTTCCTGACTA  |
| <i>Ccl3</i> rev  | AGGCATTAGTTCCAGGTCA      |
| <i>Ccl5</i> for  | GCAAGTGCTCCAATCTTGCA     |
| <i>Ccl5</i> rev  | CTTCTCTGGGTTGGCACACA     |
| <i>Ifng</i> for  | CGGCACAGTCATTGAAAGCCTA   |
| <i>Ifng</i> rev  | GTTGCTGATGGCCTGATTGTC    |
| <i>Xcl1</i> for  | CTTCCTGGGAGTCTGCTGC      |
| <i>Xcl1</i> Rev  | CAGCCGCTGGGTTTGTAAAGT    |

### Immunohistochemistry

Tumor tissue was fixed and embedded in paraffin. Tissue slices of 4  $\mu\text{m}$  were rehydrated in a series of histo-clear and graded ethanol. The tissue sections were incubated at 95 °C with citrate buffer (pH 6) for antigen retrieval and blocked with 1  $\mu\text{g}/\text{mL}$  Rat IgG (Vector Lab) diluted into 2.5 % Normal Goat Serum (Vector Labs) before staining with rabbit polyclonal anti-CD8a (361003, Synaptic Systems), anti-CCL5 (clone 25H14L17, ThermoFisher) or anti-CXCL9 (clone 11H1L14, ThermoFisher). Then the slides were washed and were incubated with ImmPRESS HRP Reagent peroxidase Anti-Rabbit IgG (Vector Labs). The sections were developed using ImmPACT DAB Chromogen (Vector Labs) and stained with haematoxylin,

dehydrated in a graded series of ethanol and histo-clear and cover slipped. Immunostaining were imaged using NanoZoomer S210 Digital slide scanner.

### **Bulk RNA-sequencing data analysis**

Fastq sequencing data files were trimmed of adapter sequences using Skewer<sup>3</sup> and reads mapped to mouse genome GRCm38.ERCC using HISAT2 aligner<sup>4</sup>. A count matrix reporting the numbers of reads mapping to each gene was generated using the featureCounts program in the Subread UNIX package<sup>5</sup> and gene expression was calculated as counts per million (CPM). Genes expressed at a level <1 CPM were excluded from further analysis. R package "edgeR" was used for data normalization and differential expression analysis<sup>6</sup>. Briefly, count data was normalized using the trimmed mean of M values (TMM) method and differential gene expression analysis between indicated samples determined using the glmQLFTest method. The Benjamini–Hochberg correction was applied to the list of differentially expressed genes to calculate corrected P-values ( $P_{adj}$ ). Genes with a  $P_{adj} < 0.05$  and an absolute  $\log_2FC > 1$  were considered as differentially expressed. T-cell inflamed and IFN- $\gamma$ -related mRNA gene expression signatures were defined and associated gene expression signature scores calculated as described by M. Ayers and colleagues<sup>7</sup>. Heatmaps showing  $\log_{CPM}$  gene expression values from TMM-normalized count data were generated using the pheatmap R package. Gene set variation analysis (GSVA) was performed using R package GSVA<sup>8</sup>. The gene ontology (GO) gene sets used were obtained from the Molecular Signatures Database<sup>9</sup>. Hierarchical clustering and heatmap visualization of the GSVA matrix was performed using R package pheatmap.

### **Single-cell RNA-sequencing (scRNA-seq) data analysis**

scRNA-seq data were pre-processed using the 10x Genomics CellRanger at the Oxford Genomics Centre and further analyzed with the R package Seurat v3.1.4<sup>10</sup>. For spleen

samples, cells with less than 200 UMI or detected genes were filtered out. For tumor samples, cells with UMI less than 500 or detected genes less than 300 were filtered out. For both types of samples, cells with higher than 10 percent of transcripts mapping to mitochondrial gene were filtered out. In addition, 100 potential doublets were removed using R package *scDblFinder* v1.3.0<sup>11</sup>. Finally, genes expressed in less than 5 cells were removed, leading to a total of 5,578 cells and 11,502 genes for analysis. SCTransform was used to normalize samples, regress out cell cycle differences and identify highly variable genes. Mitochondrial, cell cycle, ribosomal and pseudo genes were excluded from the variable genes and the top 2000 most variable genes were used for sample integration using Seurat's integration workflow. Prior to clustering, principal component analysis (PCA) was applied to the variable genes of the dataset to reduce dimensionality. The top 25 principal components were used for Seurat's K-nearest neighbor (KNN) graph-based clustering analysis and the resulting clusters were visualized using the Uniform Manifold Approximation and Projection (UMAP). Differential gene expression analysis was performed on the log-normalized data with Seurat v4.0.1 by the non-parametric Wilcoxon rank-sum test using the *FindMarkers* function followed by Bonferroni correction using all genes for adjusted p-value calculation. Top DEGs were visualized using *ComplexHeatmap* ver2.6.2. Gene signatures characterizing the four experimental groups were generated by using the DEGs, with an adjusted p-value < 0.01 and average log<sub>2</sub> fold change > 0.25, between combination therapy-treated and vaccine-treated single P1A<sub>35-43</sub>-specific CD8<sup>+</sup> T cells in the spleen and tumor, respectively. For single-cell gene signature scoring, log-normalized data was used as input with gene signature lists (Table S2), which include the four above-mentioned gene signatures, as well as stem-like and exhaustion signatures from other recent studies. Signature scores for all gene signatures were calculated using the

AddModuleScore function in Seurat followed by z-scale normalization for cross-signature comparison across cells. Clustered correlation matrix showing the Pearson correlation coefficients between various gene signatures from single P1A<sub>35-43</sub>-specific CD8<sup>+</sup> T cells was generated using R package Corrplot v0.84 and visualized after hierarchical clustering. Seurat's AverageExpression function was used to calculate the average expression of genes for each experimental group. Heatmaps were plotted using R package pheatmap v1.0.12.

## References

1. Halbroth BR, Sebastian S, Poyntz HC, *et al.* Development of a Molecular Adjuvant to Enhance Antigen-Specific CD8(+) T Cell Responses. *Sci Rep* 2018;8:15020.
2. Dicks MD, Spencer AJ, Edwards NJ, *et al.* A novel chimpanzee adenovirus vector with low human seroprevalence: improved systems for vector derivation and comparative immunogenicity. *PLoS One* 2012;7:e40385.
3. Jiang H, Lei R, Ding SW, *et al.* Skewer: a fast and accurate adapter trimmer for next-generation sequencing paired-end reads. *BMC Bioinformatics* 2014;15:182.
4. Kim D, Langmead B, Salzberg SL. HISAT: a fast spliced aligner with low memory requirements. *Nat Methods* 2015;12:357-60.
5. Liao Y, Smyth GK, Shi W. featureCounts: an efficient general purpose program for assigning sequence reads to genomic features. *Bioinformatics* 2014;30:923-30.
6. Robinson MD, McCarthy DJ, Smyth GK. edgeR: a Bioconductor package for differential expression analysis of digital gene expression data. *Bioinformatics* 2010;26:139-40.
7. Ayers M, Lunceford J, Nebozhyn M, *et al.* IFN-gamma-related mRNA profile predicts clinical response to PD-1 blockade. *J Clin Invest* 2017;127:2930-40.

8. Hanzelmann S, Castelo R, Guinney J. GSVA: gene set variation analysis for microarray and RNA-seq data. *BMC Bioinformatics* 2013;14:7.
9. Liberzon A, Subramanian A, Pinchback R, *et al.* Molecular signatures database (MSigDB) 3.0. *Bioinformatics* 2011;27:1739-40.
10. Stuart T, Butler A, Hoffman P, *et al.* Comprehensive Integration of Single-Cell Data. *Cell* 2019;177:1888-902 e21.
11. Germain PL, Sonrel A, Robinson MD. pipeComp, a general framework for the evaluation of computational pipelines, reveals performant single cell RNA-seq preprocessing tools. *Genome Biol* 2020;21:227.

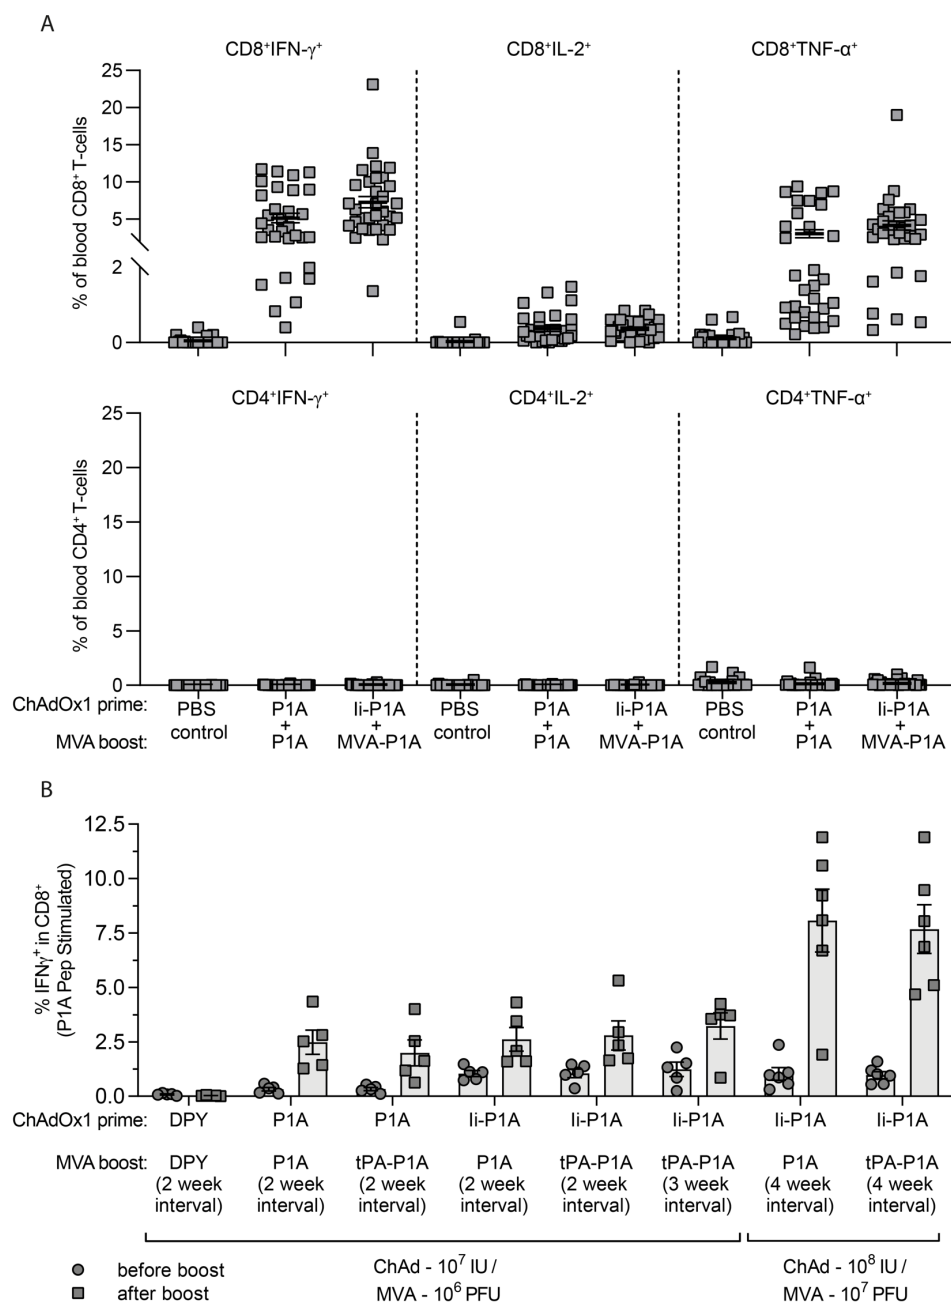

**Figure S1: Blood P1A-specific T-cell responses induced by ChAdOx1/MVA P1A vaccination schemes.** (A) DBA/2 mice received ChAdOx1-P1A ( $\pm$  li) and MVA-P1A vaccinations 4 weeks apart, and were bled after MVA vaccination as described in Fig. 1. PBMCs were stimulated *ex vivo* with 4  $\mu$ g/ml of P1A peptide pools, or a vehicle control (DMSO). The percentage of CD8<sup>+</sup> and CD4<sup>+</sup> T cells in the blood after prime-boost vaccination producing IFN- $\gamma$ , IL-2 and TNF- $\alpha$  was then determined by ICS and flow cytometry. (B) DBA/2 mice were vaccinated with different vaccination regimes (as indicated) and bled 3 days before and 14 days after the MVA vaccination. PBMCs were stimulated *ex vivo* with 4  $\mu$ g/ml of P1A peptide pools, or a vehicle control (DMSO). The percentage of IFN- $\gamma$ <sup>+</sup> CD8<sup>+</sup> T cells after prime (closed circles) and boost (closed squares) in response to stimulation with P1A peptides vaccination was then determined by ICS and flow cytometry. Data are shown as the mean  $\pm$  SEM and each symbol represents an individual mouse.

McAuliffe et al.

Supplementary material

8

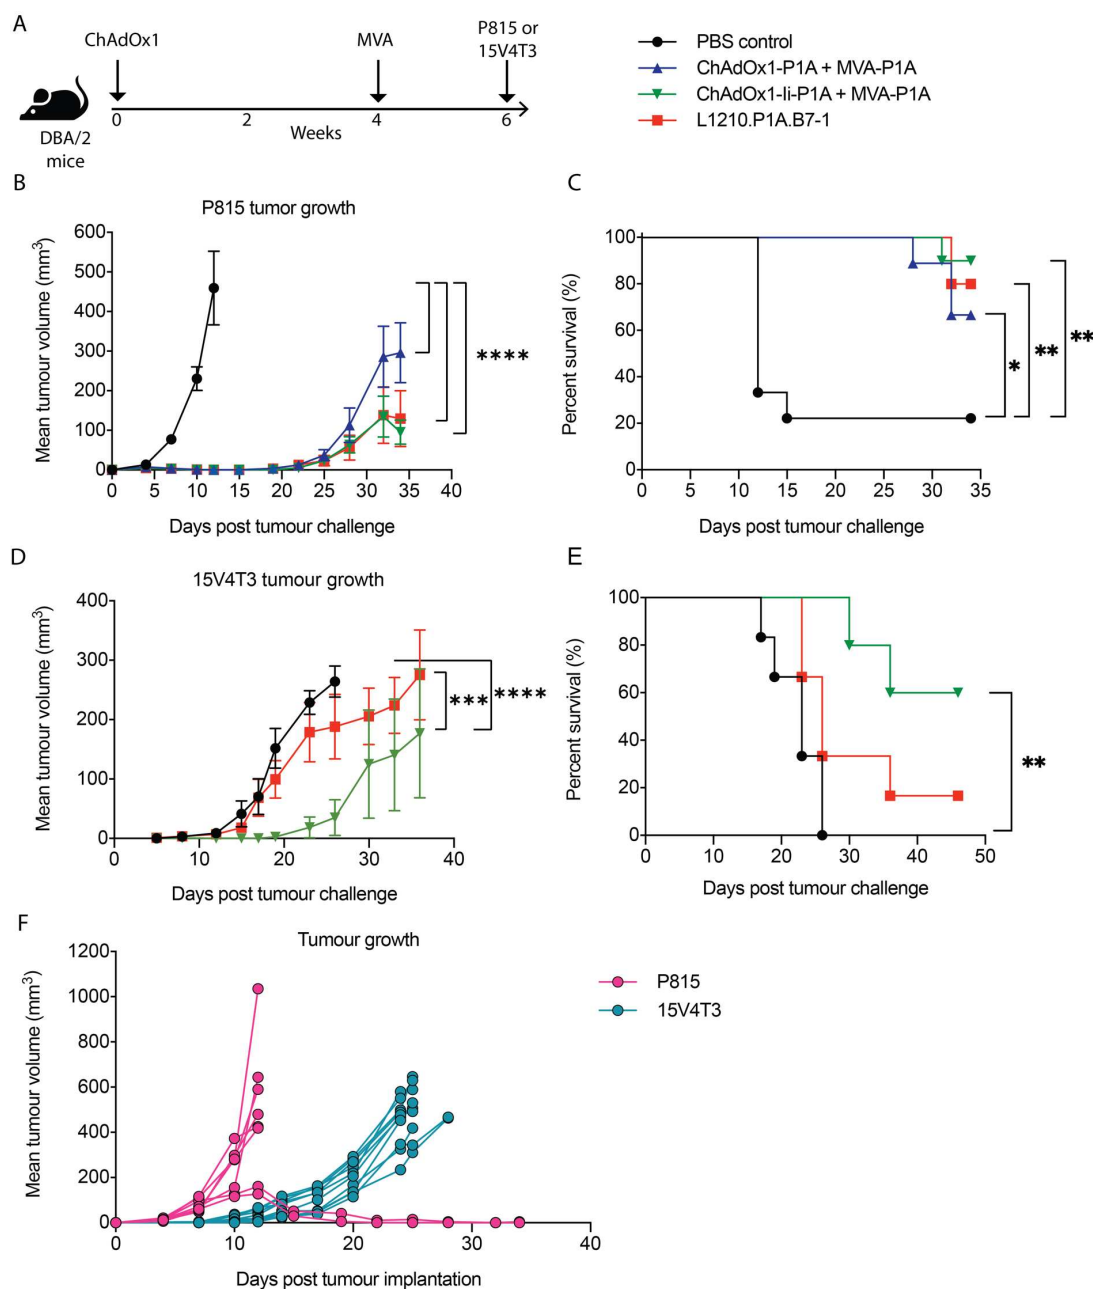

**Figure S2: ChAdOx1/MVA P1A vaccination confers protection against P1A-expressing tumors.** DBA/2 mice received a prime vaccination via intramuscular injection with  $10^8$  IU of ChAdOx1-P1A, ChAdOx1-li-P1A or a sham vaccination with PBS, then the ChAdOx1-P1A ( $\pm$  li) vaccinated mice received a boost vaccination with  $10^7$  PFU of MVA-P1A 4 weeks later. A fourth group received  $1 \times 10^6$  L1210.P1A.B7-1 cells via intraperitoneal injection. Two weeks after the MVA boost vaccination, all mice were implanted with either  $1.5 \times 10^6$  P815 or  $1 \times 10^6$  15V4T3 cells in the right flank via subcutaneous (s.c.) injection. Tumor size was then measured and mice were sacrificed when tumor size reached 10 mm length in any direction. (A) Experimental timeline. (B-E) Mean tumor growth (B and D) and survival (C and E) for P815 and 15V4T3 challenged mice are shown. (F) Individual growth curves for P815 and 15V4T3 tumors from PBS control mice. Mean tumor growth data in B and D are presented as mean tumor volume (mm<sup>3</sup>)  $\pm$  SEM. Each group contained 5-10 mice, with data representative of 2 independent experiments. Statistically significant differences were determined by a two-way ANOVA followed by Tukey's post hoc test and statistical differences in survival data were determined by a log-rank test. \*,  $p \leq 0.05$ , \*\*,  $p \leq 0.01$  \*\*\*\*,  $p \leq 0.0001$ .



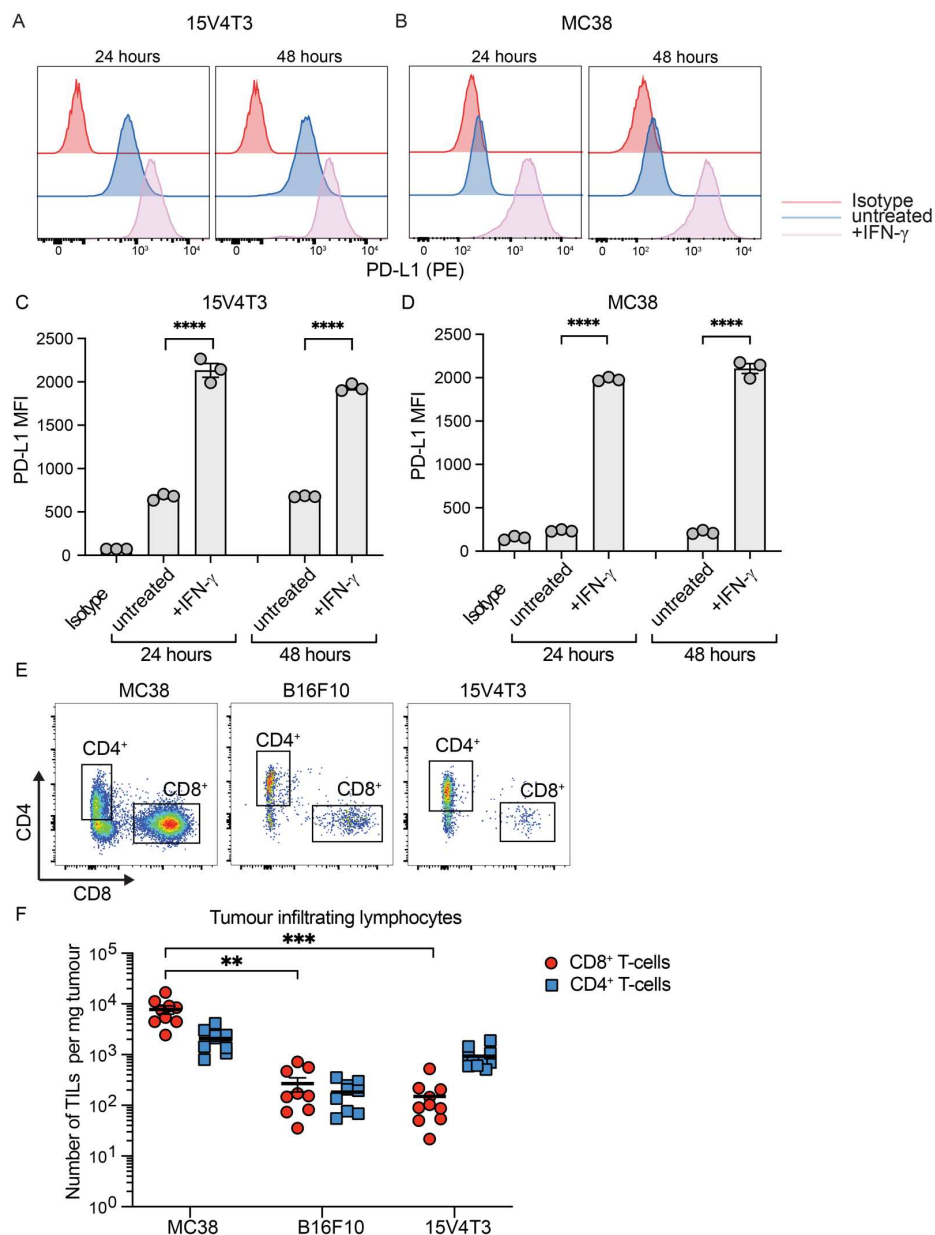

**Figure S3: Surface PD-L1 expression level and CD8<sup>+</sup> and CD4<sup>+</sup> T-cell infiltration of murine tumor models.**

15V4T3 and MC38 cells were cultured *in vitro* and stimulated with or without 20 ng/ml recombinant mouse IFN- $\gamma$  for 24 or 48 hours. Cells were then stained with either PE-anti-PD-L1 or PE-IgG2b isotype control and the level of surface PD-L1 expression was assessed by flow cytometry. Representative flow cytometry histograms for PD-L1 expression level are shown for (A) 15V4T3 and (B) MC38. The PD-L1 mean fluorescence intensity (MFI) was calculated for (C) 15V4T3 and (D) MC38 cells. Each point shows an individual technical replicate ( $n=3$  per group). Data are shown as mean  $\pm$  SEM. Statistical differences between each group were calculated by ordinary one-way ANOVA followed by Tukey's post hoc test. \*\*\*\*,  $p \leq 0.0001$ . (E, F) BL/6 mice were implanted with either  $1 \times 10^5$  MC38 or B16F10 cells and DBA/2 mice with  $1 \times 10^6$  15V4T3 cells via s.c. injection. Mice were sacrificed and tumors harvested when a size of 400-600 mm<sup>3</sup> was reached. Tumors were dissociated and the immune infiltrate was analyzed by flow cytometry. (E) Representative flow cytometry plots of CD4<sup>+</sup> and CD8<sup>+</sup> T cells, gated on live CD3<sup>+</sup> cells from MC38, B16F10 and 15V4T3 tumors. (F) Total numbers of tumor infiltrating CD4<sup>+</sup> and CD8<sup>+</sup> T cells. Data are shown as mean  $\pm$  SEM and each symbol represents an individual mouse, with  $n=9/10$  mice per group. Statistically significant difference between groups was determined by a Kruskal-Wallis test with Dunn's multiple comparisons test. \*\*  $p \leq 0.01$ , \*\*\*,  $p \leq 0.001$ .

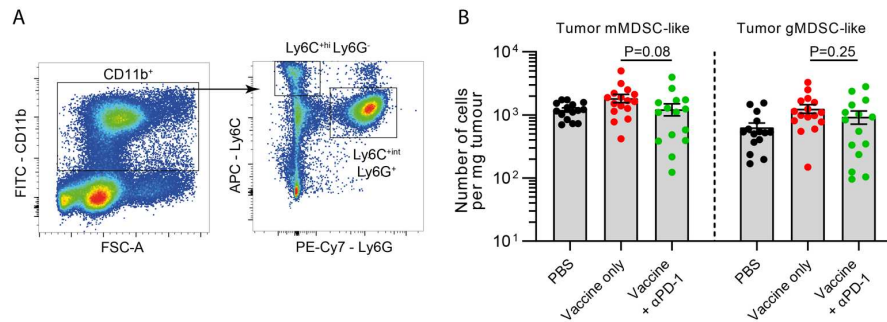

**Figure S4: MDSC-like cell infiltration into 15V4T3 tumors.** Mice bearing 15V4T3 tumors received ChAdOx/MVA P1A vaccination and were treated with anti-PD-1 as shown in Fig. 4A. Tumors were excised, processed to single cell suspension, and analyzed by flow cytometry. (A) Representative flow cytometry gating-strategy for mMDSC-like (CD11b<sup>+</sup> Ly6C<sup>hi</sup> Ly6G<sup>-</sup>) and gMDSC-like (CD11b<sup>+</sup> Ly6C<sup>int</sup> Ly6G<sup>+</sup>) cells. (B) Total numbers of tumor-infiltrating mMDSC-like and gMDSC-like cells as quantified by cytometry. Statistically significant differences between groups were compared by a Kruskal-Wallis test with Dunn's multiple comparisons test.

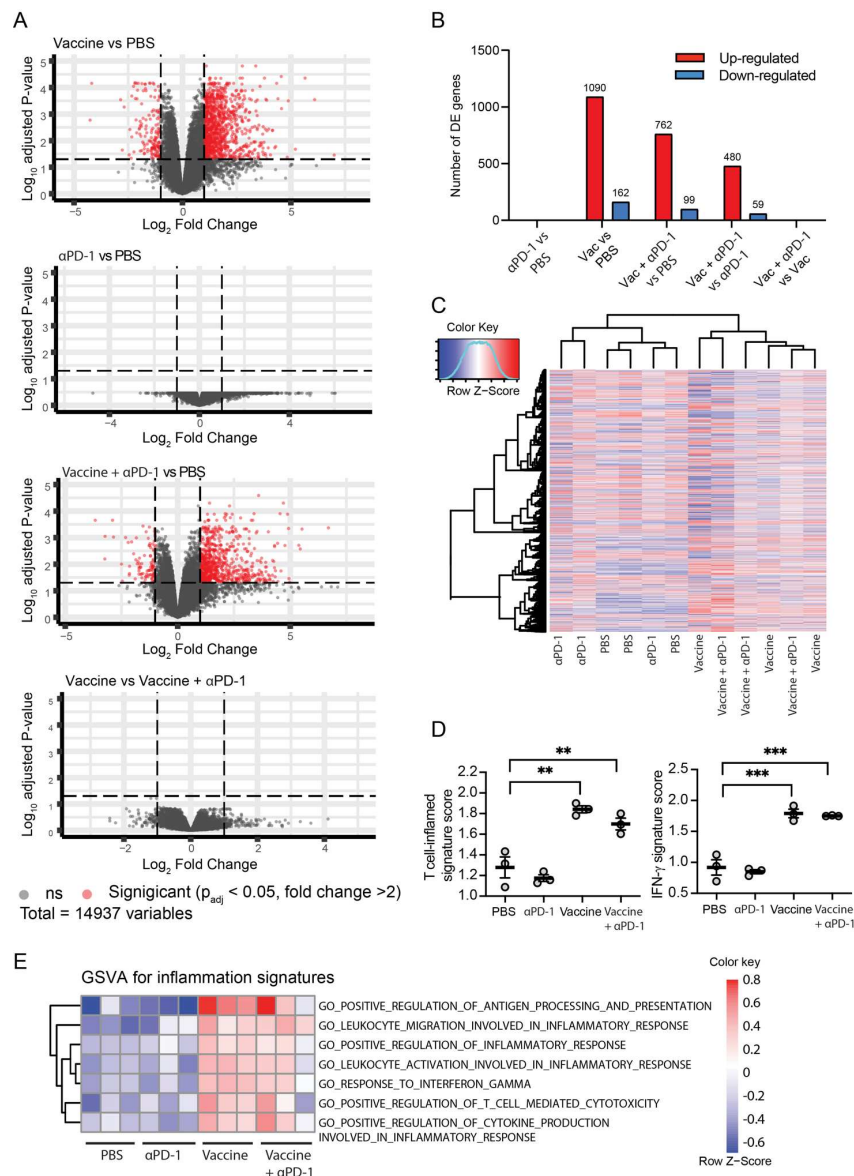

**Figure S5: Bulk RNA-seq gene expression analysis of 15V4T3 tumors.** 15V4T3 tumors were excised from the mice shown in Fig. 4 and RNA isolated from a small cutting of tumor tissue to analyze gene-expression at the transcriptional level. Tumor mRNA from each of 3 mice per group was sequenced on an Illumina NovaSeq 6000 as 150 bp paired-end reads. Following data processing, differential gene expression analysis between the anti-PD-1 only, vaccine only, and vaccine + anti-PD-1 combination treatment groups compared to the PBS control was performed using EdgeR software. (A) Volcano plots showing the distribution of differentially expressed genes (DEGs) between different experimental groups. Each point represents an individual gene, with significant DEGs shown in red. Dashed lines indicate the threshold set for significant differential expression of  $\log_2FC > 1$  and  $P_{adj} < 0.05$ . (B) Number of DEGs identified in tumors in each of the experimental group comparisons (red upregulated, blue downregulated). (C) A heatmap showing log-CPM gene expression values of all expressed genes in the dataset for each sample. Expression across each gene (rows) has been scaled by calculation of a Z-score, indicated by the heatmap color key. Unsupervised hierarchical clustering was performed at both the gene (y-axis) and sample (x-axis) level and is shown in dendrogram format. (D) T cell-inflamed and IFN- $\gamma$  gene expression signature scores for each sample. Data are shown as mean  $\pm$  SEM. Statistically significant differences between group gene signature scores were determined by an ordinary one-way ANOVA with Tukey's post hoc test. \*\*,  $p \leq 0.01$ , \*\*\*,  $p \leq 0.001$ . (E) GSEA was performed for each of the indicated gene sets and the results are visualized on a heatmap.

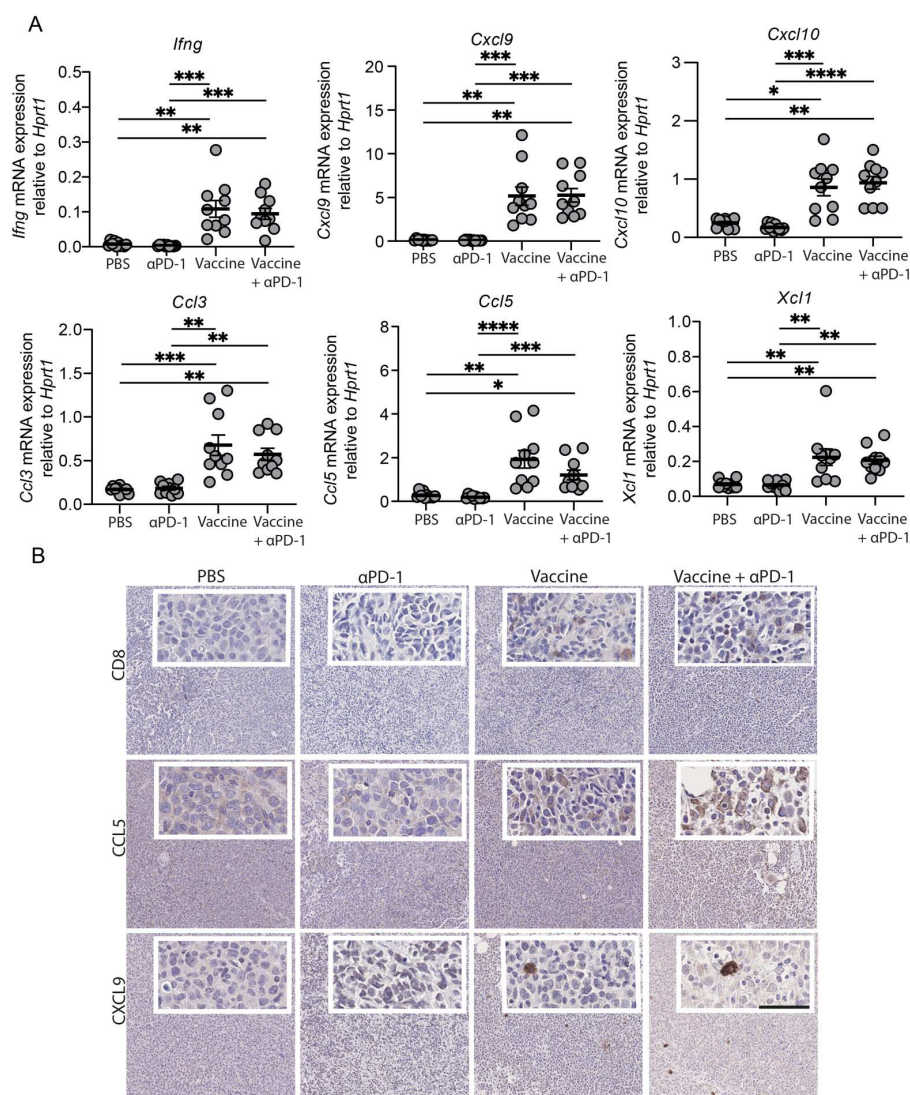

**Figure S6: Assessment of pro-inflammatory mediator expression in the 15V4T3 tumor microenvironment.**

15V4T3 tumors were excised from tumor-bearing mice vaccinated with ChAdOx1/MVA P1A and treated with anti-PD-1 as detailed in Fig. 4. (A) Tumor RNA was isolated to analyze gene expression of pro-inflammatory mediators. Expression of *Ifng*, *Cxcl9*, *Cxcl10*, *Ccl3*, *Ccl5*, and *Xcl1* mRNA in the tumor was quantified by RT-qPCR. Target gene mRNA expression level was normalized relative to *Hprt1* and is shown as  $2^{-\Delta\text{Ct}}$ . Data are presented as mean  $\pm$  SEM and each symbol represents an individual mouse, with  $n=10$  mice per group. Statistically significant differences between groups were determined by a one-way ANOVA followed by Tukey's post hoc test. \*,  $p \leq 0.05$ , \*\*,  $p \leq 0.01$ , \*\*\*,  $p \leq 0.001$  \*\*\*\*,  $p \leq 0.0001$ . (B) A cross-section cutting of tumor tissue was formalin-fixed and paraffin embedded (FFPE). Tissue sections (4  $\mu\text{m}$ ) were prepared from FFPE samples and stained with antibodies against CD8, CCL5 and CXCL9. Representative images of staining are shown of tumors from PBS control mice and each of the indicated treatment groups. Scale bars: 50  $\mu\text{m}$  (inset) and 250  $\mu\text{m}$  (overview).

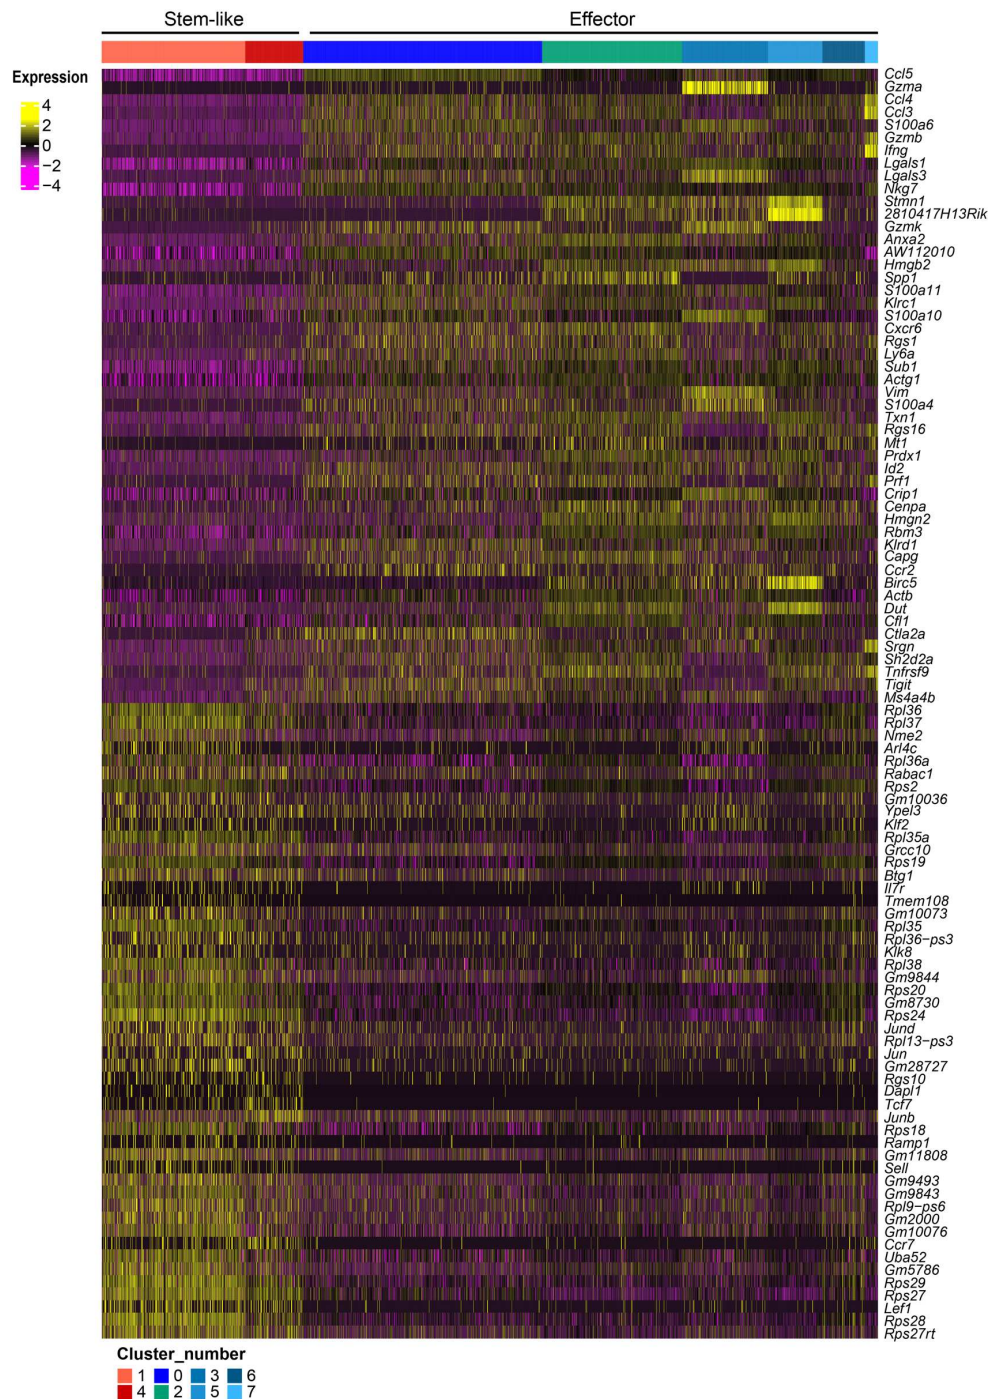

**Figure S7: Heatmap of top 100 differentially expressed genes between stem-like and effector clusters identified by scRNA-seq of P1A<sub>35-43</sub>-specific CD8<sup>+</sup> T-cells.** 15V4T3 tumor-bearing DBA/2 mice were vaccinated with ChAdOx1-ii-P1A/MVA P1A ± anti-PD-1 treatment (n=10 per group), tumors and spleens collected on day 25 and P1A<sub>35-43</sub>-specific CD8<sup>+</sup> T cells isolated via H-2L<sup>d</sup> P1A<sub>35-43</sub> tetramer staining and FACS as described in Fig. 5A. The transcriptional profile of P1A<sub>35-43</sub>-specific CD8<sup>+</sup> T cells was determined via scRNA-seq using a 10X Genomics pipeline. Gene expression profiles of single cells separated into eight clusters by k-nearest neighbor clustering analysis using Seurat. The top 100 DEGs between the stem-like clusters and effector clusters are shown.

**Table S2: P1A<sub>35-43</sub>-specific CD8<sup>+</sup> T-cell gene signatures identified by scRNA-seq**

| SpleenCombi_vs_<br>spleenVac_UP |               |               | SpleenVac_vs_<br>spleenCombi_UP |          | TumorCombi_vs_<br>tumorVac_UP | TumorVac_vs_<br>tumorCombi_UP |
|---------------------------------|---------------|---------------|---------------------------------|----------|-------------------------------|-------------------------------|
| Jund                            | Uba52         | Gm2000        | Gzmk                            | Vim      | Areg                          | Vps37b                        |
| Taf10                           | Set           | Ets1          | S100a6                          | Emp3     | Gm10709                       | Ifi2712a                      |
| Chic2                           | Rps18         | Nme1          | Ccl4                            | Cdc42    | H2-Q6                         | Rps8                          |
| Gnas                            | Arl2bp        | Rps27rt       | Ccl5                            | S100a4   | Ccl4                          | Hsp90aa1                      |
| Alyref                          | Rpl9-ps6      | Usf2          | S100a10                         | Ywhaz    | Gm8730                        | Cd7                           |
| Pcbp1                           | Emc10         | Stk24         | Klrc1                           | Arpc3    | Gm9843                        | Slc3a2                        |
| Tprgl                           | Grb2          | Rps2          | Ms4a4b                          | Gimap7   | Rps18                         | Rpl10                         |
| Ppp1cc                          | Rpl36-ps3     | Gm10073       | Nkg7                            | Actg1    | Cox17                         | Pdcd1                         |
| Arf6                            | Hnrnpab       | Gm5786        | Ctla2a                          | Ifi2712a | Uba52                         | Hsp90ab1                      |
| Rac1                            | E2f4          | Capns1        | S100a11                         | Tmem50a  | Ccl3                          | Hspd1                         |
| Btg1                            | Srsf2         | Rpl36a        | Ier3                            | Cf1      | S100a4                        | Hnrnpa3                       |
| Pitpna                          | mt-Nd4        | Ccni          | Cd48                            | Thy1     | Hcst                          | Serpib9                       |
| Dcun1d5                         | Glrx5         | Rpl6l         | Lgals1                          | Cyba     | Rpl27-ps3                     | Serpib6b                      |
| Ypel3                           | Ptms          | Gm28727       | Lsp1                            | Lck      | Rpl6l                         | Actb                          |
| Ube2s                           | Gm9493        | Nme2          | Sh2d1a                          | Hmgb2    | Rps28                         | Hnrnpa1                       |
| Tmem243                         | Mkrn1         | Rps26-ps1     | Klrd1                           | Arpc1b   | H2-Q1                         | Stat3                         |
| Tgfb1                           | Ccr7          | 2300009A05Rik | Ly6a                            | Cd3e     |                               | Mdh1                          |
| Hnrnp1                          | Ubald2        | Gm8730        | Calm2                           | AW112010 |                               | Eif4a1                        |
| Gnai2                           | Grk6          | Rps20         | Crip1                           | Actb     |                               | Sult2b1                       |
| Bag1                            | Mpnd          | Gm9844        | Lgals3                          | Tmsb4x   |                               | Stk17b                        |
| Cdc34                           | Aars          | Rps19         | Tigit                           | Cd52     |                               | Ifngr1                        |
| Ctbp1                           | Gnb1          | Rpsa          | Arl6ip5                         | Rac2     |                               | Gnb211                        |
| Klf2                            | H2-Ke6        | Rpl35         | Cd82                            | B2m      |                               |                               |
| Ybx1                            | Lamp1         | Rpl12         | Anxa2                           | Hcst     |                               |                               |
| Gm10076                         | Pdcd4         | Gm11808       | Laptm5                          | Pfn1     |                               |                               |
| Rab2a                           | 1110008F13Rik | Rps21         | Prr13                           | Sh3bgrl3 |                               |                               |
| March2                          | Rps28         | Gm8186        | Tagln2                          |          |                               |                               |
| 2310036O22Rik                   | Srm           | Rps27         | Sub1                            |          |                               |                               |
| Mtch1                           | Gm10709       | Rpl39         | Ctsd                            |          |                               |                               |
| Snf8                            | Lef1          | Rps24         | Sp100                           |          |                               |                               |
| Bri3                            | Tmem108       | Gm10260       | Prdx1                           |          |                               |                               |
| Arl4c                           | Rps29         | Rpl3          | S100a13                         |          |                               |                               |
| Abhd17a                         | Erdr1         | Rps7          | Clic1                           |          |                               |                               |
| Chmp4b                          | Efh2          | Rpl38         | Zyx                             |          |                               |                               |
| H2afy                           | Rpl13-ps3     | Rpl10a        | Pycard                          |          |                               |                               |
| Nsmce4a                         | Pcbd2         |               | Gabarapl2                       |          |                               |                               |
| Rap1b                           | Pnrc1         |               | Myl6                            |          |                               |                               |

**Table S3: Gene sets corresponding to CD8<sup>+</sup> T-cell dysfunctional and progenitor gene signatures from other published studies**

| CD39-<br>CD69-       | MEL_EXHA<br>UST_<br>Tirosh | CD8_G_Fel<br>dman | Exhaust_1_Fe<br>ldman | Exhaust_2_Fe<br>ldman | Exhaust_3_Fe<br>ldman | Mem_Eff_4_F<br>eldman | Early.Act_5_F<br>eldman | Mem_Eff_6_F<br>eldman | LCMV_PROG.EX<br>_Miller | B16_PROG.EX<br>_Miller | Stem_like_Ba<br>harom | TOX_Si<br>G<br>(Scott) | CD39+C<br>D69+ | CD8_G_Fel<br>dman | LCMV_TERM.E<br>X_Miller | B16_TERM.E<br>X_Miller |
|----------------------|----------------------------|-------------------|-----------------------|-----------------------|-----------------------|-----------------------|-------------------------|-----------------------|-------------------------|------------------------|-----------------------|------------------------|----------------|-------------------|-------------------------|------------------------|
| KLF2                 | FCRL3                      | CD38              | SPC25                 | GEM                   | CCL3                  | LMNA                  | ELL2                    | PLAC8                 | ID3                     | CCR6                   | Ctla4                 | IGKC                   | ENTPD1         | IL7R              | 181001H11RIK            | GZMD                   |
| AQP3                 | CD27                       | CCL3              | CDC45                 | LAYN                  | EPSTI1                | NR4A3                 | PFKFB3                  | S1PR1                 | CCR7                    | TCF7                   | Dapl1                 | AVIL                   | CD69           | GPR183            | ACOXL                   | GZMG                   |
| CLIC3                | PRKCH                      | STMN1             | ESCO2                 | VCAM1                 | CD38                  | GPR183                | DTHD1                   | SORL1                 | CD83                    | AFF3                   | Socs3                 | TOX                    | RRM2           | LMNA              | CD244                   | GZMF                   |
| LINC008<br>61        | B2M                        | MYO7A             | CDC45                 | RDH10                 | FASLG                 | CDKN1A                | SMAP2                   | SELL                  | BACE2                   | CXCR5                  | Tox                   | KLRB1C                 | TYMS           | NR4A3             | RASD2                   | GZME                   |
| CD8B                 | ITM2A                      | GOLIM4            | ZWINT                 | FAM3C                 | IFI44L                | CCR7                  | FKBP5                   | TCF7                  | ITGA7                   | DAPL1                  | Gpr183                | MEGF1<br>1             | CD8B           | TCF7              | FCER1G                  | DSC2                   |
| FAM65<br>B           | TIGIT                      | VCAM1             | SHCBP1                | KIR2DL4               | GIMAP6                | S1PR1                 | AIM1                    | CCR7                  | TNFSF11                 | ID3                    | Nr4a2                 | SCD1                   | KIAA010<br>1   | MGAT4A            | OSGIN1                  | RASD2                  |
| FGFBP2               | ID3                        | WARS              | DLGAP5                | TNFRSF18              | TRAFD1                | KDM6B                 | TMEM39A                 | IL7R                  | IL1R2                   | SLAMF6                 | Xcl1                  | RP23-<br>284K1.<br>6   | CCL3           | CD55              | CCL6                    | CCL9                   |
| RASA3                | GBP2                       | HAVCR2            | RAD51                 | MTSS1                 | LGALS9                | ELL2                  | NR4A3                   | MGAT4A                | SOSTDC1                 | OTX1                   | Rgs16                 | PIF1                   | TUBA1B         | AIM1              | CD200R2                 | LTF                    |
| C10orf5<br>4         | PDCD1                      | LGALS9            | KIF18B                | CADM1                 | CXCR6                 | TIPARP                | PER1                    | FAM65B                | DAPL1                   | CD22                   | Rpl12                 | TNFRSF<br>8            | MKI67          | PER1              | GM10389                 | CCR1                   |
| SAMD3                | KLRK1                      | ID3               | RRM2                  | ENTPD1                | RAB37                 | SC5D                  | TSPYL2                  | LTB                   | BMP7                    | TNFRSF25               | Cd28                  | TMEM<br>163            | UBE2C          | FOSL2             | CDK14                   | 181001H11RIK           |
| CD27                 | HSPA1A                     | PRDX3             | BIRC5                 | ETV1                  | CCR5                  | PLK3                  | TTN                     | FLT3LG                | GCAT                    | VAT1L                  | Id3                   | NR2F6                  | HLA-<br>DOA2   | EGR1              | GPR56                   | IGSF5                  |
| FAIM3                | SRGN                       | MCM5              | TK1                   | AFAP1L2               | ZBP1                  | CD55                  | TMEM2                   | PXN                   | FAM160A1                | 2610019F03RI<br>K      | Pou2f2                | SERPIN<br>B6B          | CDK1           | TSPYL2            | AA467197                | GZMC                   |
| S100A1<br>0          | TNFRSF9                    | LSM2              | HJURP                 | TNFRSF9               | SAMD9L                | NR4A1                 | IL6ST                   | A2M                   | IL7R                    | HECTD2                 | Junb                  | FGR                    | STMN1          | YPEL5             | CSF1                    | HTRA3                  |
| LYAR                 | TMBIM6                     | MTHFD1            | UBE2C                 | NAB1                  | SIRPG                 | REL                   | NAB1                    | ATM                   | TNC                     | MAPK11                 | Eef1b2                | LRRK1                  | IL5            | CSRNP1            | SLC16A10                | LTB4R1                 |
| BIN1                 | TNFRSF1B                   | FASLG             | CCNB2                 | PELI1                 | MX1                   | PBX4                  | IQGAP2                  | C20orf112             | SERPINA9                | ART3                   | Rplp0                 | SUV39<br>H2            | NDFIP2         | REL               | GZMA                    | CD200R2                |
| CTD-<br>3184A7.<br>4 | CADM1                      | SNAP47            | CENPW                 | DFNB31                | HAVCR2                | TNF                   | SLC7A5                  | GPR183                | SLC43A1                 | TNFSF14                | Rps15a                | ESM1                   | DUSP6          | SKIL              | SFPI1                   | LGJ2                   |
| KANSL1<br>-AS1       | ACTB                       | IFI35             | GINS2                 | CTLA4                 | ACPS                  | IL7R                  | IPCEF1                  | EPB41                 | ART3                    | TNFSF8                 | Rps24                 | CENPE                  | CSF2           | PIK3R1            | RAC3                    | KLHL30                 |
| UBXN11               | CD8A                       | SKA2              | RAD51AP1              | HSPB1                 | DDX60                 | RGCC                  | DCTN6                   | ADD3                  | PGCP                    | S1PR1                  | Ly6e                  | CCR2                   | XCL1           | FOXP1             | P2RY6                   | MGAT3                  |
| ZFP36L2              | RGS2                       | NDUFB3            | DTL                   | FKBP4                 | PDCD1                 | FOSL2                 | DUSP4                   | GRAP2                 | 2610019F03RIK           | FAM84A                 | Rpl6                  | KLRC1                  | UBE2S          | RGCC              | HTRA3                   | SERPINB9B              |
| PPP2R5<br>C          | FAIM3                      | FABP5             | SPC24                 | NAMPTL                | SH2D3C                | SIK1                  | RANBP2                  | KLRG1                 | WNT3                    | PGCP                   | Tcf7                  | NTSDC<br>2             | TOP2A          | PFKFB3            | IL20RA                  | GLIS1                  |
| LITAF                | EID1                       | IFI27L2           | CDC43                 | MYO7A                 | GPR174                | CSRNP1                | FAM177A1                | GIMAP5                | TUBA8                   | LIF                    | Zfp3611               | CD244                  | HIST1H4<br>C   | MYADM             | E230016K23RIK           | FCRL6                  |
| ZNF683               | HSPB1                      | PTTG1             | PKMYT1                | CXCL13                | RPS6KA1               | GPR132                | GABARAPL1               | TC2N                  | CCR6                    | TREML2                 | Rpl10a                | ASPM                   | AIF1           | ZFP36L2           | GPR97                   | PRPH                   |
| S1PR1                | RNF19A                     | ENTPD1            | MELK                  | GOLIM4                | GBP5                  | GLUL                  | RGPD6                   | TXNIP                 | WNT1                    | SYNPO                  | Rps20                 | FAM20<br>A             | TUBB           | USP36             | CHN2                    | LRRN4                  |

McAuliffe et al.

Supplementary material

16

| CD39-CD69- | MEL_EXHAUST_Tirosh | CD8_B_Fel dman | Exhaust_1_Fel dman | Exhaust_2_Fel dman | Exhaust_3_Fel dman | Mem_Eff_4_F eldman | Early_Act_5_F eldman | Mem_Eff_6_F eldman | LCMV_PROG.EX_Miller | B16_PROG.EX_Miller | Stem_like_Ba harom | TOX_Si G (Scott) | CD39+C D69+ | CD8_G_Fel dman | LCMV_TERM.N.E X_Miller | B16_TERMIN.EX_Miller |
|------------|--------------------|----------------|--------------------|--------------------|--------------------|--------------------|----------------------|--------------------|---------------------|--------------------|--------------------|------------------|-------------|----------------|------------------------|----------------------|
| TCF7       | IFI16              | EPST11         | ANLN               | PHLDA1             | GBP1               | KIAA1683           | CTLA4                | GIMAP2             | SHANK1              | SOSTDC1            | Nsg2               | ZDHHC2           | CLSPN       | TC2N           | 5031414D18RIK          | HAVCR2               |
| GIMAP4     | LYST               | PDCD1          | CDC48              | DNAJA4             | PTPN6              | RALGAPA1           | CREM                 | TNFAIP8            | OAF                 | WNT10A             | Rpl36a             | UBASH3B          | IFI27       | FAM177A1       | VILL                   | CD244                |
| MYC        | PRF1               | TRAFD1         | KIAA0101           | TGIF1              | S100BPB            | PRNP               | ETS1                 | IL16               | MAGED1              | KCNMB1             | Rps27a             | SAPCD2           | HMMR        | BTG2           | KLRA3                  | 5830473C10RIK        |
| S1PR4      | STAT1              | SIRPG          | GGH                | HAVCR2             | IFI35              | PRMT10             | PNRC1                |                    | MORN4               | CD40LG             | Rgs1               | SCD2             | EGR1        | TSC22D2        | KLRA7                  | RASSF6               |
| CD52       | UBC                | RGS3           | AURKB              | APLP2              | OAS3               | SORL1              | ZFP36L2              |                    | SCMH1               | DTX1               | Actn1              | KIF20B           | KPNA2       | FAM65B         | RANBP17                | GPR56                |
| STK38      | CD74               | UBE2F          | ASF1B              | GPR56              | SNAP47             | FAM177A1           | RGPD5                |                    | NSG2                | DHRS3              | Bcl2               | CCR5             | TPX2        | STAT4          | S1PR5                  | GZMB                 |
| NEAT1      | IL2RG              | SNRPD1         | CDC20              | BPGM               | GIMAP4             | CHMP1B             | ZNF331               |                    | PAQR8               | SELL               | Tnfaip3            | ACSL3            | ZWINT       | RGPD5          | GM4956                 | 1300014I06RIK        |
| LGALS3     | FYN                | FIBP           | NCAPG              | SEC14L1            | PARP9              | ZC3H12A            | CNOT6L               |                    | KIT                 | ST8SIA1            | Cd69               | WEE1             | TK1         | NEU1           | TYROBP                 | FILIP1               |
| GZMM       | PTPN6              | CLTA           | DHFR               | TNIP3              | IFNG               | TSC22D2            | TGIF1                |                    | BC048355            | TNFRSF13B          | Rps9               | HMMR             | CD38        | IFRD1          | HEYL                   | CDKN2A               |
| SORL1      | HLA-DRB1           | CXCL13         | KIFC1              | METRNL             | SIT1               | P2RY8              | CXCL13               |                    | 4930583H14RIK       | CXCC5              | Jun                | SH2D5            | UBE2T       | PDE4B          | TIFAB                  | GPR97                |
| AL592183.1 | HNRNPC             | NMI            | TYMS               | HSPH1              | PYCARD             | NEU1               | PDE4D                |                    | TWIST2              | PLA2G4F            | Rps8               | MYO1E            | NUSAP1      | NR4A1          | KLRA9                  | AA467197             |
| R3HDM4     | UBB                | DNPH1          | CKAP2L             | KLRC2              | RGS3               | TCF7               | RNF19A               |                    | SLC12A8             | XCL1               | Rpl29              | CENPF            | PCNA        | AGPAT9         | ADAM8                  |                      |
| MIAT       | CD8B               | PCNA           | CLSPN              | PMAIP1             | XAF1               | ZNF683             |                      |                    | HSD3B7              | CD83               | Rps10              | HAVCR2           | CENPF       | KLRB1C         | CDH17                  |                      |
| ANXA4      | HAVCR2             | ACP5           | MLF1IP             | DUSP4              | OAS2               | MYADM              |                      |                    | TCF7                | CYR61              | Fam46c             | EOMES            | H2AFX       | ENTPD1         | FCER1G                 |                      |
| LEF1       | IRF8               | MRPL28         | TROAP              | IGFLR1             | C5orf56            | ATP2B1             |                      |                    | 1700019D03RIK       | KLF3               | Rps28              | PAK6             | CRTAM       | INSC           | EPDR1                  |                      |
| TSC22D3    | LAG3               | FARSA          | KIF2C              | HSPA1A             | GIMAP5             | CREM               |                      |                    | H2-OB               | S1PR5              | Rpl21              | AHR              | ASPM        | RAB3IL1        | CHL1                   |                      |
| IL7R       | ATP5B              | COX5A          | WDR34              | ZFAND2A            | ABI3               | OAT                |                      |                    | ROPN1L              | FAM160A1           | Rpl7a              | ARSB             | GTSE1       | CHIT1          | IL1R2                  |                      |
| P2RY8      | STAT3              | MRPL51         | CDK1               | NDFIP2             | SNX20              | NFE2L2             |                      |                    | XCL1                | SH2B3              | Sid1               | KLRK1            | TNFRSF18    | GLP1R          | CCL3                   |                      |
| PLEC       | IGFLR1             | SNRPE          | KIF23              | PAM                | VAMP5              | DNAJB9             |                      |                    | CD22                | TESPA1             | Traf1              | IL10             | MYBL2       | HDHD3          | SPP1                   |                      |
| ERN1       | MGEA5              | RANBP1         | PLK1               | TP53INP1           | IRF2               | SKIL               |                      |                    | FCRL1               | LRIG1              | Ppp1r15a           | CKAP5            | CKS1B       | ATG9B          | ACOXL                  |                      |
| TSPAN32    | HSPA1B             | NOP10          | TOP2A              | AH1                | UBASH3A            | DENND4A            |                      |                    | TNP2                | IL18               | Crtam              | ALYREF           | SPC25       | ARAP3          | ENTPD1                 |                      |
| S100A4     | COTL1              | PYCARD         | NUF2               | UBE2F              | PARP10             | SERTAD1            |                      |                    | MMP10               | NSG2               | Rps18              | GEN1             | CDKN3       | TRPC1          | CALCA                  |                      |
| SELL       | VCAM1              | GTF3C6         | HMGB3              | HSPA4              | GIMAP7             | YPEL5              |                      |                    | FAM190A             | SSPO               | Rpl18a             | IL24             | IFNG        | FAM19A3        | CTNND2                 |                      |
| RASGRP2    | HLA-DMA            | CCR5           | ASPM               | ICOS               | GBP4               | BCL6               |                      |                    | LTA                 | TBC1D4             | Dusp1              | ECT2             | AURKA       | SERPINB1A      | NEB                    |                      |
| GADD45B    | PDE7B              | GSTO1          | MCM2               | CHORDC1            | PVRIG              | EGR1               |                      |                    | DYNC2L1             | SH3BP5             | Uba52              | MKI67            | FEN1        | QSER1          | LY6G5B                 |                      |



McAuliffe et al.

Supplementary material

17

| CD39-CD69-    | MEL_EXHAUST_Tirosh | CD8_B_Fel dman | Exhaust_1_Fel dman | Exhaust_2_Fel dman | Exhaust_3_Fel dman | Mem_Eff_4_F eldman | Early_Act_5_F eldman | Mem_Eff_6_F eldman | LCMV_PROG.EX_Miller | B16_PROG.EX_Miller | Stem_like_Ba harom | TOX_Si G (Scott) | CD39+C D69+ | CD8_G_Fel dman | LCMV_TERM.N.E X_Miller | B16_TERMIN.EX_Miller |
|---------------|--------------------|----------------|--------------------|--------------------|--------------------|--------------------|----------------------|--------------------|---------------------|--------------------|--------------------|------------------|-------------|----------------|------------------------|----------------------|
| C11orf21      | TBC1D4             | OAS3           | ORC6               | TRPS1              | CYTH4              | PDE4B              |                      |                    | DPYSL5              | P2RX7              | Rplp1              | GTF2IR D1        | GIN52       |                | WDR31                  | UPP1                 |
| PIK3IP1       | SNAP47             | IGFLR1         | CASC5              | TBC1D4             | DTX3L              | ANXA1              |                      |                    | AICDA               | TNP2               | Cd27               | GZMA             | CD40LG      |                | RIPPLY3                | AOAH                 |
| RNASET2       | RGS4               | HLA-DMA        | CENPH              | RALA               | RHOC               | SOD2               |                      |                    | MNDA                | SAMD3              | Rpl15              | HMGCS1           | AURKB       |                | PPP1R3B                | MT2                  |
| S100A6        | CLBL               | STRA13         | FEN1               | CD82               | SASH3              | RNF125             |                      |                    | TNFRSF26            | FAM178B            | Gnb2l1             | BSPRY            | NCAPG       |                | STYK1                  | MREG                 |
| CCDC109B      | TOX                | HSD17B10       | BRCA1              | SEMA4A             | CCL4L2             | GADD45B            |                      |                    | NME4                | ZFP467             | Cxcr3              | ZBTB32           | TNFSF10     |                | CCL4                   | P2RY14               |
| RAMP1         | CALM2              | VAMP5          | MCM4               | PON2               | IFI6               | SELK               |                      |                    | DMRTA1              | FAM81A             | Rps4x              | TUBB6            | PLK1        |                | FASL                   | ADORA3               |
| RP11-640M9.1  | ATHL1              | NDUFAB1        | TIMELESS           | ACP5               | BCAS4              | RORA               |                      |                    | STOM                | SLC2A6             | Rpl23a             | BUB1             | IL2RA       |                | CDH17                  | EPAS1                |
| GPR155        | SPDYES             | BATF           | MKI67              | CCDC64             | IKZF3              | SELL               |                      |                    | TMOD2               | GALNT14            | Rpl27a             | ANLN             | AGPAT9      |                | ATP8A2                 | PLXND1               |
| TXNIP         | DDX5               | NDUF52         | CDKN3              | BHLHE40            | GIMAP2             | MXD1               |                      |                    | SLFN5               | GUCY1A3            | Rpl34              | SGOL2A           | CCND2       |                | ATF3                   | CDKN1A               |
| CDC25B        | SLA                | C17orf49       | APOBEC3B           | NAMPT              | ADORA2A            | IFRD1              |                      |                    | SLC22A17            | PRSS2              | Lag3               | ULBP1            | CENPE       |                | 4930515G01RIK          | NPNT                 |
| ISG20         | PTPRCAP            | GN5            | CCNB1              | AHSA1              | ARPC5L             | PIK3R1             |                      |                    | LIF                 | AQP3               | Rplp2              | LMNB1            | CDC20       |                | H2-DMB1                | 3300005D01RIK        |
| TRADD         | IRF9               | PSMB2          | TPX2               | BANP               | GYG1               | TUBB4B             |                      |                    | GM17384             | GZMM               | Rpl39              | CCNA2            | CCNB1       |                | LRRN4                  | FGL2                 |
| CRBN          | MATR3              | PDIAG          | NCAPG2             | RHBDD2             | SLFN5              | HECA               |                      |                    | PTER                | F2RL1              | Eef1a1             | COBLL1           | SMC2        |                | GZMB                   | ASB2                 |
| GIMAP7        | LITAF              | COMMD3         | KIF11              | CREM               | CHST12             | MPZL3              |                      |                    | GM4814              | OAF                | Rpl14              | HRAS             | BIRC5       |                | SEPNI                  | PPP1R3B              |
| C16orf54      | TPI1               | CD63           | TCF19              | SLC7A5             | APOBEC3D           | USP36              |                      |                    | SLAMF6              | COLQ               | Rps3               | STK39            | TUBA1C      |                | SEPT4                  | IL10                 |
| FBXL8         | ETV1               | PSMA4          | UBE2T              | CACYBP             | WARS               | INSIG1             |                      |                    | CLDN10              | CCR7               | Rpl28              | FANCB            | CCNA2       |                | KCNJ8                  | GPR35                |
| ODF2L         | PAM                | SAE1           | SPAG5              | NUSAP1             | UBE2L6             | LTB                |                      |                    | JAM3                | TNFSF11            | Naca               | SRSF2            | CKS2        |                | MIRGPRE                | ADRB1                |
| LDLRAP1       | ARID4B             | ATP5J          | BRCA2              | STIP1              | TMEM140            | NR4A2              |                      |                    | AFF3                | TNFRSF26           | PISD               | MPP6             | BIRC3       |                | 2900026A02RIK          | MT1                  |
| MXI1          | NAB1               | MEA1           | CCNA2              | LRMP               | CSK                | SLC2A3             |                      |                    | KIFC3               | SLC15A1            | Rpl17              | FHL2             | KRT7        |                | PWWP2B                 | LAT2                 |
| RCBTB2        | RAPGEF6            | EXOSC9         | BUB1B              | PDE3B              | F2R                | PER1               |                      |                    | CCDC116             | BACH2              | Rps19              | KIF11            | CENPW       |                | ACTN2                  | D430041D05RIK        |
| HSD17B11      | LDHA               | ARPC5L         | CHEK1              | RG52               | CTSS               | S100A10            |                      |                    | TNS1                | EMB                | Inpp4b             | NCAPG2           | MCM7        |                | ETV5                   | RG58                 |
| CLEC2B        | WARS               | BLOC1S1        | BUB1               | CCDC141            | SLAMF7             | AIM1               |                      |                    | VIPR2               | CXCR3              | Zbtb32             | FKBP5            | ADAM19      |                | CXCR6                  | OIT3                 |
| EMP3          | RASSF5             | HELLS          | FANCI              | SNAP47             | CXCR3              | MGAT4A             |                      |                    | BCL2L14             | NAPB               | Rpl13              | ANKLE1           | TNF         |                | TSGA10                 | RASL12               |
| SH3BP5        | OSBPL3             | CXCR6          | CENPM              | DEDD2              | CD27               | CDC42EP3           |                      |                    | GPR15               | IL1RL1             | Rps21              | STIL             | C15orf48    |                | FGL2                   | SLC13A3              |
| RP11-539L10.2 | FAM3C              | BCAS4          | RNASEH2A           | BTG3               | PPP1R18            | NDEL1              |                      |                    | MAPK11              | HEMGN              | Limd2              | PRC1             | DLGAP5      |                | PPP2R2C                | SLC16A10             |

McAuliffe et al.

Supplementary material

18

| CD39-CD69-    | MEL_EXHAUST_Tirosh | CD8_B_Feldman | Exhaust_1_Feldman | Exhaust_2_Feldman | Exhaust_3_Feldman | Mem_Eff_4_Feldman | Early_Act_5_Feldman | Mem_Eff_6_Feldman | LCMV_PROG.EX_Miller | B16_PROG.EX_Miller | Stem_like_Baharom | TOX_SiG (Scott) | CD39+C D69+ | CD8_G_Feldman | LCMV_TERM.N.E X_Miller | B16_TERMIN.EX_Miller |
|---------------|--------------------|---------------|-------------------|-------------------|-------------------|-------------------|---------------------|-------------------|---------------------|--------------------|-------------------|-----------------|-------------|---------------|------------------------|----------------------|
| MIR142        | TAP1               | ETFB          | HIRIP3            | ITPRIP            | TOX               | IDI1              |                     |                   | ENO2                | ARC                | Rpl37a            | GPR141          | DUSP5       |               | EDARADD                | PRF1                 |
| CLUAP1        | HLA-DRB6           | TXN2          | MAD2L1            | HSPA1B            | CTSC              | EIF4A3            |                     |                   | 9230110C19RIK       | ANGPTL2            | Rpl23             | MTMR1           | KIF11       |               | FGD2                   | 2810025M15RIK        |
| YPEL3         | FABP5              | PTPN6         | CCNF              | GALNT2            | SLAMF6            | BIRC3             |                     |                   | CXCR5               | PRNP               | Rps2              | NFIL3           | CCNB2       |               | FCGR3                  | MYO10                |
| SLCO3A1       | CD200              | SIT1          | STMN1             | TNFSF9            | STAT1             | TSPYL2            |                     |                   | AFAP1               | CD81               | Rpl22             | BUB1B           | ACOT7       |               | SYTL2                  | CD14                 |
| NOSIP         | CTLA4              | FKBP1A        | SMC2              | RANGAP1           | FUT8              | DCTN6             |                     |                   | C3AR1               | CRTAM              | Rpsa              | ITGAV           | CASC5       |               | IL10                   | CDKN2B               |
| IL10RA        | SNX9               | COPZ1         | CKS1B             | PDCD1             | IDH2              | HSPH1             |                     |                   | PRUNE2              | POUGF1             | Rpl8              | SWAP70          | PBK         |               | 6230409E13RIK          | TSGA10               |
| CD55          | ETNK1              | HLA-DRA       | PAICS             | DDX3Y             | PCED1B            | CDK17             |                     |                   | SH3BP5              | PLD4               | Ighm              | USP1            | CDC43       |               | HAVCR2                 | WNT10B               |
| RP11-395B7.4  | MALAT1             | CDC123        | NCAPH             | ARIDS5B           | BST2              | DDX21             |                     |                   | SFMBT2              | DNASE1L3           | Rpl11             | ENTPD1          | TESC        |               | EPDR1                  | BCMO1                |
| MED15         | ZDHC6              | AP2S1         | ATAD5             | DUSP10            | PSMB10            | PPP1R15B          |                     |                   | NT5E                | JUB                | Cd9               | RAC1            | DUT         |               | RAP5N                  | F2RL2                |
| ATM           | ARL6IP5            | FUT8          | PRC1              | ZBTB1             | STAT2             | ZNF331            |                     |                   | OASL2               | ZHX2               | Rps15             | SGOL1           | CENPM       |               | SH3TC1                 | VIPR2                |
| KLHL24        | DUSP2              | BST2          | RFC5              | SAMSN1            | RNASET2           | BTG2              |                     |                   | 1700025K23RIK       | RAB37              | Rpl32             | NCAPG           | KIF23       |               | LRRC27                 | SYNPO2               |
| ZNF276        | HLA-DQB1           | ATP6V1E1      | CENPF             | IRF4              | RBCK1             | AMD1              |                     |                   | CCDC122             | KLF4               | Rpl24             | PGP             | ATAD2       |               | PLEKHF1                | 2900026A02RIK        |
| ANXA1         | HNRNPK             | CD2BP2        | CENPN             | CD2BP2            | SEL1L3            | SLC7A5            |                     |                   | GSPT2               | THA1               | Fam101b           | SPAG5           | SGOL2       |               | THRB                   | PPP2R2C              |
| PLP2          | DGKH               | HLA-DQA1      | CDCA7             | SYNGR2            | C14orf159         | POLR3E            |                     |                   | TREML2              | SLC1A2             | Rpl22l1           | SLC25A13        | TPM4        |               | CISH                   | OPTN                 |
| AHNAK         | LRMP               | ZCRB1         | CHTF18            | CDK6              | HLA-DRA           | JMJD6             |                     |                   | ISPD                | GATSL3             | Rps16             | EMILIN2         | AGTRAP      |               | CCL3                   | DAB2IP               |
| DDI2          | H3F3B              | MX1           | CENPE             | MCTP2             | GZMA              | CHD1              |                     |                   | SELL                | CMAH               | Rpl5              | TRIM59          | MAD2L1      |               | LAT2                   | ULBP1                |
| VNN2          | IDH2               | TNFRSF9       | WDR76             | RAB27A            | CD63              | TAF13             |                     |                   | AIP1                | CAR2               | Gimap6            | CCNB1           | NDC80       |               | TMPRSS6                | CCL4                 |
| VCL           | TRAF5              | SQRDL         | FBXO5             | HSPD1             | DENND2D           | VPS37B            |                     |                   | CLEC12A             | ARL4D              | Ltb               | MASTL           | NUDT1       |               | PRDM1                  | CLGN                 |
| EPB41         | TBL1XR1            | SERPINB1      | CDCA7L            | NFAT5             | HLA-DQB1          | GTF2B             |                     |                   | KBTBD11             | TRAT1              | Pacsin1           | ASB2            | CDT1        |               | CD7                    | CCR5                 |
| DND1          | ANKRD10            | PHPT1         | RFC4              | BATF              | PRF1              | PAF1              |                     |                   | CXCL10              | SESN3              | Mif               | SRSF9           | CENPA       |               | LYN                    | SV2C                 |
| MAPKA PK5-AS1 | ALDOA              | CALM3         | POLD1             | GZMB              | CD84              | BCAS2             |                     |                   | LRRC49              | BCL6               | Rps23             | CDC25C          | RPL39L      |               | XCR1                   | CD55                 |
| CDC425E1      | LSP1               | TOX           | LRR1              | NEU1              | TIGIT             | RGPD6             |                     |                   | LRIG1               | SLFN5              | Smc4              | MAN2A1          | SHCBP1      |               | GP49A                  | OSGIN1               |
| PXN           | PTPN7              | SNRPC         | RACGAP1           | SYT11             | CCL4L1            | TUBA4A            |                     |                   | P2RX7               | MTMR7              | Myc               | KNTC1           | CDCA8       |               | F2RL2                  | CD200R4              |
| SYNJ2         | NSUN2              | MRPS34        | SNRNP25           | CXCR6             | PLSCR1            | RASA3             |                     |                   | SLC2A6              | TLR1               | Rpl3              | AURKA           | CEP55       |               | CTNND2                 | CHN2                 |
| SIGIRR        | RNF149             | NUTF2         | KNTC1             | CNIH1             | LAG3              | GPCPD1            |                     |                   | RAMP3               | FAM53B             | Cst7              | TOPBP1          | BRCA1       |               | LIM2                   | SPATS2               |

McAuliffe et al.

Supplementary material

19

| CD39-CD69- | MEL_EXHAUST_Tirosh | CD8_B_Feldman | Exhaust_1_Feldman | Exhaust_2_Feldman | Exhaust_3_Feldman | Mem_Eff_4_Feldman | Early_Act_5_Feldman | Mem_Eff_6_Feldman | LCMV_PROG.EX_Miller | B16_PROG.EX_Miller | Stem_like_Baharom | TOX_SIG (Scott) | CD39+C D69+ | CD8_G_Feldman | LCMV_TERM.N.E X_Miller | B16_TERMIN.EX_Miller |
|------------|--------------------|---------------|-------------------|-------------------|-------------------|-------------------|---------------------|-------------------|---------------------|--------------------|-------------------|-----------------|-------------|---------------|------------------------|----------------------|
| PDE6G      | CD2                | NDUFS6        | NUDT1             | FCRL3             | DAXX              | RASGEF1B          |                     |                   | ST6GAL1             | CCDC64             | Ifi2712a          | CEP55           | ORC6        |               | CELA1                  | GIPC2                |
| SLAMF6     | SRSF1              | PSMB3         | ACOT7             | CRTAM             | PHF11             | DNAJA1            |                     |                   | ESPN                |                    | Rpl9              | UGCG            | CISH        |               | ABI3                   | JAM2                 |
| TIMP1      | GOLPH3             | CHMP2A        | CDK2              | TTN               | IGFLR1            | FAM46C            |                     |                   |                     |                    | Rpl37             |                 | MX1         |               |                        |                      |
|            | HLA-A              | SLC25A11      | GMNN              | TOX               | ATP6V1E1          | PTP4A1            |                     |                   |                     |                    | Itpkb             |                 |             |               |                        |                      |
|            | LIMS1              | SHFM1         | TMEM106C          | MORF4L2           | HLA-DQA1          | TUBA1A            |                     |                   |                     |                    | Rps3a1            |                 |             |               |                        |                      |
|            | SDF4               | TMEM179B      | LIG1              | TIGIT             | CMTM3             | KPNA2             |                     |                   |                     |                    | Rpl35             |                 |             |               |                        |                      |
|            | ROCK1              | EIF6          | FANCG             | DCTN6             | DNAJC4            | ZFAND5            |                     |                   |                     |                    | Ccr7              |                 |             |               |                        |                      |
|            | EDEM1              | ANXA5         | MXD3              | MTHFD2            | LASP1             | SLC38A2           |                     |                   |                     |                    | Eef1g             |                 |             |               |                        |                      |
|            | APLP2              | JAKMIP1       | PCNA              | FUT8              | HLA-DMA           | PLIN2             |                     |                   |                     |                    | Rps27             |                 |             |               |                        |                      |
|            | ITK                | TALDO1        | C19orf48          | GATA3             | NCKAP1L           | HEXIM1            |                     |                   |                     |                    | Odc1              |                 |             |               |                        |                      |
|            | TRIM22             | GLRX3         | POLA2             | STAT5B            | OASL              | TMEM123           |                     |                   |                     |                    | Rpl35a            |                 |             |               |                        |                      |
|            | SPRY2              | ANAPC11       | POLE              | AKIRIN2           | TMEM179B          | JUND              |                     |                   |                     |                    | Slamf6            |                 |             |               |                        |                      |
|            | ACTG1              | DUT           | NDC80             | WHSC1L1           | CCL4              | MTRNR2L1          |                     |                   |                     |                    | Rps26             |                 |             |               |                        |                      |
|            | HLA-DPA1           | PDCD5         | MCM3              | STAT3             | USB1              | GABARAPL1         |                     |                   |                     |                    | Rps11             |                 |             |               |                        |                      |
|            | EWSR1              | ATP5G3        | CDK4              | ZEB2              | UBE2F             | STAT4             |                     |                   |                     |                    | Rpl4              |                 |             |               |                        |                      |
|            | SRSF4              | CHMP5         | SLC43A3           | MSI2              | CHMP5             | ALG13             |                     |                   |                     |                    | Gimap7            |                 |             |               |                        |                      |
|            | ESYT1              | TWF2          | TUBG1             | B3GNT2            | C19orf66          | FOSB              |                     |                   |                     |                    | Emb               |                 |             |               |                        |                      |
|            | LUC7L3             | IDH2          | NME1              | EIF4E             | PPM1M             | GPR65             |                     |                   |                     |                    | Rpl36             |                 |             |               |                        |                      |
|            | ARNT               | MPG           | HAUS8             | CKS2              | ST8SIA4           | SDCBP             |                     |                   |                     |                    | Rps7              |                 |             |               |                        |                      |
|            | GNAS               | SNRPF         | MCM7              | HSPE1             | YARS              | HBP1              |                     |                   |                     |                    | Kbtbd11           |                 |             |               |                        |                      |
|            | ARF6               | NDUFC1        | NCAPD2            | KPNA2             | TBC1D10C          | MAP3K8            |                     |                   |                     |                    | Fosb              |                 |             |               |                        |                      |
|            | ARPC5L             | GBP1          | RFC2              | NGRN              | DRAP1             | RANBP2            |                     |                   |                     |                    | Rps5              |                 |             |               |                        |                      |
|            | NCOA3              | DCTN3         | SHMT1             | PTPN11            | POLD4             | FAM129A           |                     |                   |                     |                    | Rps29             |                 |             |               |                        |                      |
|            | PAPOLA             | ERH           | DTYMK             | SNAP23            | TRAPP1            | FOS               |                     |                   |                     |                    | Rpl26             |                 |             |               |                        |                      |
|            | GFOD1              | NDUFA12       | PHF19             | RASGEF1B          | PKN1              | DDIT3             |                     |                   |                     |                    | lpcef1            |                 |             |               |                        |                      |

McAuliffe et al.

Supplementary material

20

| CD39-<br>CD69- | MEL_EXHA<br>UST_<br>Tirosh | CD8_B_Fel<br>dman | Exhaust_1_Fe<br>ldman | Exhaust_2_Fe<br>ldman | Exhaust_3_Fe<br>ldman | Mem_Eff_4_F<br>eldman | Early.Act_5_F<br>eldman | Mem_Eff_6_F<br>eldman | LCMV_PROG.EX<br>_Miller | B16_PROG.EX<br>_Miller | Stem_like_Ba<br>harom | TOX_SI<br>G<br>(Scott) | CD39+C<br>D69+ | CD8_G_Fel<br>dman | LCMV_TERM.NE<br>X_Miller | B16_TERMIN.EX<br>_Miller |
|----------------|----------------------------|-------------------|-----------------------|-----------------------|-----------------------|-----------------------|-------------------------|-----------------------|-------------------------|------------------------|-----------------------|------------------------|----------------|-------------------|--------------------------|--------------------------|
|                | GPR174                     | LIMS1             | POLD3                 | PFKFB3                | JAKMIP1               | CCNH                  |                         |                       |                         |                        | Rpl30                 |                        |                |                   |                          |                          |
|                | DDX3X                      | BANF1             | DCTPP1                | TNFRSF1B              | LCP2                  | RGPD5                 |                         |                       |                         |                        | Rpl18                 |                        |                |                   |                          |                          |
|                | CAPRIN1                    | NDUFC2            | POP7                  | CD27                  | CASP4                 | TUBA1C                |                         |                       |                         |                        | Rps6                  |                        |                |                   |                          |                          |
|                | ARPC2                      | PSMC3             | AHCY                  | TRIM13                | APOL2                 | ATP1B3                |                         |                       |                         |                        | Npm1                  |                        |                |                   |                          |                          |
|                | PDIA6                      | PON2              | TEX30                 | ARNT                  | CASP1                 | GLIPR1                |                         |                       |                         |                        | Psen2                 |                        |                |                   |                          |                          |
|                | SEMA4A                     | PRDX5             | NUSAP1                | SQSTM1                | ABCA2                 | PRDM2                 |                         |                       |                         |                        |                       |                        |                |                   |                          |                          |
|                | CSDE1                      | TMX1              | DUT                   | MOB4                  | HLA-DRB5              | EMD                   |                         |                       |                         |                        |                       |                        |                |                   |                          |                          |
|                | PSMB9                      | STOML2            | KIF18A                | VPS37B                | IFI27L2               | HSPD1                 |                         |                       |                         |                        |                       |                        |                |                   |                          |                          |
|                | NFATC1                     | RPS6KA1           | MRPL17                | ARL8B                 | SYNRG                 | MORF4L2               |                         |                       |                         |                        |                       |                        |                |                   |                          |                          |
|                | PAM                        | GGCT              | TMEM140               | ARHGAP30              | IL21R                 |                       |                         |                       |                         |                        |                       |                        |                |                   |                          |                          |
|                | ATP5J2                     | CENPK             | DNAJA1                | IRF7                  | NFKBIA                |                       |                         |                       |                         |                        |                       |                        |                |                   |                          |                          |
|                | GIMAP6                     | HAUS4             | ZC3H7A                | RARRES3               | LYAR                  |                       |                         |                       |                         |                        |                       |                        |                |                   |                          |                          |
|                | NDUFB7                     | POLD2             | GALM                  | HMOX2                 | DNAJB6                |                       |                         |                       |                         |                        |                       |                        |                |                   |                          |                          |
|                | DBI                        | LMNB1             | STAT5A                | LSM2                  | TMBIM1                |                       |                         |                       |                         |                        |                       |                        |                |                   |                          |                          |
|                | IFI6                       | BLM               | CARD16                | GZMH                  | PFKFB3                |                       |                         |                       |                         |                        |                       |                        |                |                   |                          |                          |
|                | TSTA3                      | PRIM1             | AMD1                  | ISG15                 | FAM65B                |                       |                         |                       |                         |                        |                       |                        |                |                   |                          |                          |
|                | SSNA1                      | MT1E              | RGCC                  | CHFR                  | MED29                 |                       |                         |                       |                         |                        |                       |                        |                |                   |                          |                          |
|                | ADORA2A                    | CDCA4             | GOLGA4                | TRPV2                 | B4GALT1               |                       |                         |                       |                         |                        |                       |                        |                |                   |                          |                          |
|                | FDPS                       | RRM1              | SDCBP                 | ZNHIT1                | NXF1                  |                       |                         |                       |                         |                        |                       |                        |                |                   |                          |                          |
|                | CYC1                       | RBBP8             | HNRNPLL               | HLA-DPA1              | BIRC2                 |                       |                         |                       |                         |                        |                       |                        |                |                   |                          |                          |
|                | PSMD4                      | NCAPD3            | NR4A1                 | UBA7                  | ARHGAP26              |                       |                         |                       |                         |                        |                       |                        |                |                   |                          |                          |
|                | FAM96A                     | TFDP1             | BIRC3                 | ADAM8                 | SYAP1                 |                       |                         |                       |                         |                        |                       |                        |                |                   |                          |                          |
|                | OAS2                       | UNG               | FBXW11                | GOLIM4                | DNTTIP2               |                       |                         |                       |                         |                        |                       |                        |                |                   |                          |                          |
|                | ERCC1                      | ATAD2             | TANK                  | SERPINB1              | ETF1                  |                       |                         |                       |                         |                        |                       |                        |                |                   |                          |                          |
|                | PDHB                       | ACAT2             | ASXL2                 | ATF6B                 | BTG1                  |                       |                         |                       |                         |                        |                       |                        |                |                   |                          |                          |

McAuliffe et al.

Supplementary material

21

| CD39-CD69- | MEL_EXHAUST_Tirosh | CD8_G_Feldman | Exhaust_1_Feldman | Exhaust_2_Feldman | Exhaust_3_Feldman | Mem_Eff_4_Feldman | Early_Act_5_Feldman | Mem_Eff_6_Feldman | LCMV_PROG.EX_Miller | B16_PROG.EX_Miller | Stem_like_Baharom | TOX_SIG (Scott) | CD39+CD69+ | CD8_G_Feldman | LCMV_TERM.NE X_Miller | B16_TERMIN.EX_Miller |
|------------|--------------------|---------------|-------------------|-------------------|-------------------|-------------------|---------------------|-------------------|---------------------|--------------------|-------------------|-----------------|------------|---------------|-----------------------|----------------------|
|            |                    | CD27          | HADH              | EIF5              | SHISA5            | PBXIP1            |                     |                   |                     |                    |                   |                 |            |               |                       |                      |
|            |                    | SNRPA         | PAFAH1B3          | FKBP1A            | ITGB7             | MKNK2             |                     |                   |                     |                    |                   |                 |            |               |                       |                      |
|            |                    | UBE2L3        | YEATS4            | GSPT1             | TMBIM4            | DEDD2             |                     |                   |                     |                    |                   |                 |            |               |                       |                      |
|            |                    | MDH1          | RPA3              | JMJD6             | TRAF3IP3          | AKIRIN1           |                     |                   |                     |                    |                   |                 |            |               |                       |                      |
|            |                    | SDHC          | TIMM10            | PRDM1             | GPR171            |                   |                     |                   |                     |                    |                   |                 |            |               |                       |                      |
|            |                    | PSMG2         | MCM5              | LAPTM4A           | TRAF5             |                   |                     |                   |                     |                    |                   |                 |            |               |                       |                      |
|            |                    | C11orf48      | FANCD2            | IL21R             | ARHGEF3           |                   |                     |                   |                     |                    |                   |                 |            |               |                       |                      |
|            |                    | PSMA2         | RAD51C            | ARPP19            | PSMB8             |                   |                     |                   |                     |                    |                   |                 |            |               |                       |                      |
|            |                    | C7orf73       | ICMT              | FABP5             | IL2RB             |                   |                     |                   |                     |                    |                   |                 |            |               |                       |                      |
|            |                    | MRPS16        | HIST1H1D          | SAR1B             | APOBEC3G          |                   |                     |                   |                     |                    |                   |                 |            |               |                       |                      |
|            |                    | MCM7          | LSM5              | LYST              | CALCOCO2          |                   |                     |                   |                     |                    |                   |                 |            |               |                       |                      |
|            |                    | SNX20         | SSRP1             | EZH2              | MPHOSPH9          |                   |                     |                   |                     |                    |                   |                 |            |               |                       |                      |
|            |                    | AK2           | HIST1H4C          | HERPUD1           | DTHD1             |                   |                     |                   |                     |                    |                   |                 |            |               |                       |                      |
|            |                    | RBBP7         | DPYSL2            | TRAF5             | LY6E              |                   |                     |                   |                     |                    |                   |                 |            |               |                       |                      |
|            |                    | TIGIT         | TTF2              | ANXA5             | PPCS              |                   |                     |                   |                     |                    |                   |                 |            |               |                       |                      |
|            |                    | TMPO          | EEF1E1            | ZNF331            | CAPN1             |                   |                     |                   |                     |                    |                   |                 |            |               |                       |                      |
|            |                    | CTSB          | NUP37             | UBE2B             | GBP2              |                   |                     |                   |                     |                    |                   |                 |            |               |                       |                      |
|            |                    | PARP1         | EBNA1BP2          | HBP1              | PYHIN1            |                   |                     |                   |                     |                    |                   |                 |            |               |                       |                      |
|            |                    | USB1          | CCDC167           | SYTL3             | FKBP1A            |                   |                     |                   |                     |                    |                   |                 |            |               |                       |                      |
|            |                    | MRPS7         | MSH2              | GTF3C1            | NUDT22            |                   |                     |                   |                     |                    |                   |                 |            |               |                       |                      |
|            |                    | NHP2          | FH                | FAS               | CTSD              |                   |                     |                   |                     |                    |                   |                 |            |               |                       |                      |
|            |                    | ATP5I         | DDX11             | SPPL2A            | TRIM14            |                   |                     |                   |                     |                    |                   |                 |            |               |                       |                      |
|            |                    | PSMC1         | MRPL12            | ATXN1             | SLC25A45          |                   |                     |                   |                     |                    |                   |                 |            |               |                       |                      |
|            |                    | VDAC1         | PRDX4             | GGA2              | KLRD1             |                   |                     |                   |                     |                    |                   |                 |            |               |                       |                      |
|            |                    | CARD16        | DNAJC9            | C5orf15           | UCP2              |                   |                     |                   |                     |                    |                   |                 |            |               |                       |                      |

McAuliffe et al.

Supplementary material

22

| CD3<br>9-<br>CD6<br>9- | MEL_EXHA<br>UST_<br>Tirosh | CD8_B_Fel<br>dman | Exhaust_1_Fel<br>dman | Exhaust_2_Fel<br>dman | Exhaust_3_Fel<br>dman | Mem_Eff_4_Fe<br>ldman | Early.Act_5_Fe<br>ldman | Mem_Eff_6_Fe<br>ldman | LCMV_PROG.EX<br>_Miller | B16_PROG.EX<br>_Miller | Stem_like_Ba<br>harom | TOX_<br>SIG<br>(Scott<br>) | CD39+CD<br>69+ | CD8_G_Fel<br>dman | LCMV_TERMN.EX<br>_Miller | B16_TERMN.EX<br>_Miller |
|------------------------|----------------------------|-------------------|-----------------------|-----------------------|-----------------------|-----------------------|-------------------------|-----------------------|-------------------------|------------------------|-----------------------|----------------------------|----------------|-------------------|--------------------------|-------------------------|
|                        |                            | RNF181            | ANAPC15               | TSPYL2                | UNC13D                |                       |                         |                       |                         |                        |                       |                            |                |                   |                          |                         |
|                        |                            | PGAM1             | ITGB3BP               | PMF1                  | PSMB9                 |                       |                         |                       |                         |                        |                       |                            |                |                   |                          |                         |
|                        |                            | NT5C              | MAGOHB                | RBPJ                  | GSDMD                 |                       |                         |                       |                         |                        |                       |                            |                |                   |                          |                         |
|                        |                            | IRF2              | MMS22L                | POLR3E                | IRF9                  |                       |                         |                       |                         |                        |                       |                            |                |                   |                          |                         |
|                        |                            | NUDT22            | ACTL6A                | RAPGEF1               | MPG                   |                       |                         |                       |                         |                        |                       |                            |                |                   |                          |                         |
|                        |                            | NDUFA9            | BOLA3                 | NOP58                 | MYO1F                 |                       |                         |                       |                         |                        |                       |                            |                |                   |                          |                         |
|                        |                            | SR1               | USP1                  | EED                   | SLFN12L               |                       |                         |                       |                         |                        |                       |                            |                |                   |                          |                         |
|                        |                            | GBP4              | NABP2                 | CHST12                | FERMT3                |                       |                         |                       |                         |                        |                       |                            |                |                   |                          |                         |
|                        |                            | NDUFS8            | MCM6                  | GTF2B                 | MUS81                 |                       |                         |                       |                         |                        |                       |                            |                |                   |                          |                         |
|                        |                            | PSMC2             | RUVBL2                | TMX4                  | APOL6                 |                       |                         |                       |                         |                        |                       |                            |                |                   |                          |                         |
|                        |                            | FBX5              | VRK1                  | CCND2                 | C17orf62              |                       |                         |                       |                         |                        |                       |                            |                |                   |                          |                         |
|                        |                            | PLSCR1            | NCAPH2                | PAPOLA                | FCRL3                 |                       |                         |                       |                         |                        |                       |                            |                |                   |                          |                         |
|                        |                            | POLR2G            | HELLS                 | FAM53B                | ICAM3                 |                       |                         |                       |                         |                        |                       |                            |                |                   |                          |                         |
|                        |                            | COX8A             | KIF22                 | CCT4                  | SP140                 |                       |                         |                       |                         |                        |                       |                            |                |                   |                          |                         |
|                        |                            | SLX1B             | WHSC1                 | TRIM59                |                       |                       |                         |                       |                         |                        |                       |                            |                |                   |                          |                         |
|                        |                            | TRAPPC1           | MYL6B                 | FXR1                  |                       |                       |                         |                       |                         |                        |                       |                            |                |                   |                          |                         |
|                        |                            | ABI3              | PDCD5                 | PPIL4                 |                       |                       |                         |                       |                         |                        |                       |                            |                |                   |                          |                         |
|                        |                            | CBX5              | SHMT2                 | LAG3                  |                       |                       |                         |                       |                         |                        |                       |                            |                |                   |                          |                         |
|                        |                            | PSMD14            | HIST1H1C              | DNAJB6                |                       |                       |                         |                       |                         |                        |                       |                            |                |                   |                          |                         |
|                        |                            | UBE2L6            | RANBP1                | SMAP2                 |                       |                       |                         |                       |                         |                        |                       |                            |                |                   |                          |                         |
|                        |                            | IFNG              | SCCPDH                | RP11-345J4.5          |                       |                       |                         |                       |                         |                        |                       |                            |                |                   |                          |                         |
|                        |                            | DECR1             | HAUS1                 | GPBP1                 |                       |                       |                         |                       |                         |                        |                       |                            |                |                   |                          |                         |
|                        |                            | ITGB1BP1          | MRPS23                | SERTAD1               |                       |                       |                         |                       |                         |                        |                       |                            |                |                   |                          |                         |
|                        |                            | AKR1B1            | UBR7                  | PAG1                  |                       |                       |                         |                       |                         |                        |                       |                            |                |                   |                          |                         |
|                        |                            | PSMA5             | POLR2H                | TRIM26                |                       |                       |                         |                       |                         |                        |                       |                            |                |                   |                          |                         |
|                        |                            |                   |                       | TCP1                  |                       |                       |                         |                       |                         |                        |                       |                            |                |                   |                          |                         |
|                        |                            |                   |                       | AZIN1                 |                       |                       |                         |                       |                         |                        |                       |                            |                |                   |                          |                         |
